# Supplementary material
Source: PubMed Central journal article supplement (PMC4985930)
Supplement: MCB.00870-15_zmb999101287so1.pdf [file MCB.00870-15_zmb999101287so1.pdf]

Supplemental materials

**The phosphatase Rtr1 regulates global levels of serine 5 RNA  
Polymerase II C-terminal domain phosphorylation and  
cotranscriptional histone methylation**

Gerald O. Hunter<sup>1</sup>, Melanie J. Fox<sup>1</sup>, Whitney R. Smith-Kinnaman<sup>1</sup>, Madelaine Gogol<sup>2</sup>, Brian Fleharty<sup>2</sup>, Amber L. Mosley<sup>1,3\*</sup>

<sup>1</sup>Department of Biochemistry and Molecular Biology, Indiana University School of Medicine, Indianapolis, Indiana 46202

<sup>2</sup>Stowers Institute for Medical Research, Kansas City, Missouri 64110, USA

<sup>3</sup>Center for Computational Biology and Bioinformatics, Indiana University School of Medicine, Indianapolis, Indiana 46202, USA

\*To whom correspondence should be addressed: Tel: (317) 278-2350; Fax: (317) 274-4686;  
Email: [almosley@iu.edu](mailto:almosley@iu.edu)

Present Address: Amber L. Mosley, Department of Biochemistry and Molecular Biology, Indiana University School of Medicine, John D. Van Nuys Medical Science Building, 635 Barnhill Drive, room MS1021H, Indianapolis, Indiana 46202, USA.

## Supplemental methods

### ChIP - Quantitative PCR

*S. cerevisiae* strains were derived from BY4741. The WT, *rtr1Δ*, and *rtr2Δ* strains were purchased from yeast knockout collection (GE Dharmacon) (1) and genotypes were confirmed by PCR. Chromatin solutions were prepared as described previously (2), and IP was performed as described previously (3) but with 2μl of 3E8 rat monoclonal antibody (Millipore). The abundance of IP and input DNA was analyzed by qPCR on Mastercycler RealPlex<sup>2</sup> Thermocycler (Eppendorf) and Sybergreen Master Mix (Roche). Primers relative to the ATG on the *PMA1* gene were as follows: PMA1 -73, 5'- CCCCAGCTAGTTAAAGAAAAT CATTGAA - 3'; PMA1 +71, 5'- TCTTGAGTTGGCTGATGAGCTGAA - 3'; PMA1 +1010, 5' - GTTTGCCAG CTGTCGTTACCACCA C - 3'; PMA1 +1250, 5' - TTCTTCTTTCTGGAAGCAGCCAAAC -3'; PMA1 +2018, 5' - CTATTATTGATGCTTTGAAGACCTCCAG - 3'; PMA1 +2290, 5' - TGCCCAAATAATAG ACATACCCCAT A - 3'. The real time PCR parameters were as follows: 95°C for 3min for one cycle, 95°C 15 sec, 54°C for 45 sec, 72°C for 25 sec for 40 cycles, followed by one cycle of 95°C for 15 sec, 55°C for 15 sec, and 95°C for 15 sec. To calculate the amount of DNA in each sample, a standard curve of known concentrations of yeast genomic DNA was amplified with each PCR primer set. Fold enrichment was calculated by dividing the percent IP of the indicated regions over the percent IP of a control region on chromosome V as performed previously (4,5).

### ChIP-exo

ChIP-exo analysis was performed as described in Fox *et al* 2015 (6) according to methods developed by the Pugh lab (2,7). In brief, WT and *rtr1Δ* strains were transformed with a 3X-FLAG tagging cassette containing the URA3 marker for selection of integration following homologous recombination. Strains were confirmed by western blot, affinity purification mass spectrometry, and sequencing. ChIP was performed using FLAG affinity resin (Sigma) to isolate RNAPII complexes and their associated DNA from both strain backgrounds. Exonuclease treatment of the isolated complexes and SOLID library construction was performed as described (2,6,7). SOLID sequencing data processing and alignment was also performed as previously reported (6).

### ChIP-exo normalization

The Rpb3-FLAG ChIP-exo data was used for comparison with the serine 5-phosphorylated RNAPII ChIP on chip data. Since the two datasets were obtained using a different analytical platform, the average gene analysis for total RNAPII (Rpb3-FLAG) was not used to directly normalize the Ser5-P RNAPII data. To use a similar approach for data normalization, the Rpb3-FLAG data from wild-type and *rtr1Δ* strains was processed as follows. The read counts per nucleotide in the yeast genome were summed for each microarray probe region. This resulted in a lower resolution dataset than what was experimentally measured however this transformation was required for proper comparison to the ChIP-chip dataset. As shown in Figure S1, the reduction in the total resolution for the Rpb3-FLAG ChIP-exo data did not result in any significant changes in the total RNAPII occupancy at the *PMA1* gene. Following data binning to the microarray probe coordinates, the dataset was median normalization as previously performed for the ChIP-chip datasets. The resulting values were then log transformed ( $\log_2$ ) as shown in Figure 2B in the main text. For direct normalization of the Ser5-P RNAPII levels at *PMA1* and *LEU1* shown in Figure 5, we calculated the percent of maximum RNAPII occupancy at each gene across the wild-type and *rtr1Δ* Rpb3-FLAG binned data. Using these values, we were able to normalize the levels of Ser5-P RNAPII by the relative amounts of total RNAPII occupancy across the genes to adjust for any changes in total RNAPII levels. For reference, the percent maximum calculations are shown as Figure S2.

**Table S1:** Gene ontology enrichment analysis of the RNAPII target genes in each of the five Ser5-P RNAPII clusters.

**Figure S1: Examples of ChIP-exo data processing to match Agilent 1x244k microarray probe density.** **A.** Raw read count data for Rpb3-FLAG ChIP-exo data at *PMA1* and *LEU1* region on chromosome 7. **B.** Raw read count data for the same region as in A following binning of the read count data to match the probe density on the Agilent 1x244k array.

**Figure S2: Percent maximum read count data at *PMA1* and *LEU1*.** Data for the same region shown in Figure S1 and Figure 5 following binning of the data, median normalization of the dataset, and calculation of percent maximum total RNAPII occupancy.

**Figure S3: Rtr2 does not affect Ser5-P dephosphorylation at *PMA1*.** In *S. cerevisiae*, Rtr2 is a protein of unknown function and is a paralog of Rtr1 that arose during genome duplication (8). Previous studies have shown that Rtr1 causes changes in Ser5-P patterns (3,5,9). However, given ~30% sequence identity between the two proteins, and presumably similar amounts of Rtr2 protein present in yeast when compared to Rtr1, the question arises as to whether Rtr2 also displays phosphatase activity. Our previous attempts to purify Rtr2 have revealed that the protein is insoluble when expressed in bacteria (data not shown). To determine the effects of Rtr2 deletion on the levels of Ser5-P *in vivo*, we performed ChIP-qPCR analysis to reveal the levels of Ser5-P RNAPII on the *PMA1* gene from *rtr1Δ* and *rtr2Δ* strains and compared to WT (Figure S1). *PMA1* is a highly expressed gene in yeast that has previously been used as a prototypical gene to study the localization of different forms of RNAPII phosphorylation (4). A schematic of the *PMA1* gene and the primers used for PCR amplification are shown in Figure S1A. We found a significant increase in Ser5-P RNAPII levels in the *rtr1Δ* strain in the midpoint of the gene body (Figure S1B). In contrast, the levels of Ser5-P observed in the *rtr2Δ* strain were consistent with WT levels at all three regions. These data support previous findings that Rtr1 is the phosphatase that targets Ser5-P RNAPII during transcription elongation. Interestingly, Rtr2 does not appear to contribute to RNAPII dephosphorylation at *PMA1*. Overall, these data suggest that Rtr2 is not a regulator of Ser5-P CTD modification at RNAPII target genes.

**Table S1: Statistically overrepresented GO terms within each cluster (p<0.01 cutoff)**

| Cluster 1         |                                                     | P-Value  |
|-------------------|-----------------------------------------------------|----------|
| <u>GO:0016491</u> | Oxidoreductase Activity                             | 9.82E-11 |
| <u>GO:0016209</u> | Antioxidant Activity                                | 1.43E-05 |
| <u>GO:0004601</u> | Peroxidase Activity                                 | 0.000118 |
| <u>GO:0016684</u> | Oxidoreductase Activity                             | 0.000118 |
| <u>GO:0006790</u> | Sulfur metabolism                                   | 0.000668 |
| <u>GO:0015891</u> | Siderophore Transport                               | 0.000873 |
| <u>GO:0005381</u> | Iron Ion Transmembrane Transporter                  | 0.00111  |
| <u>GO:0004364</u> | Glutathione Transferase Activity                    | 0.00142  |
| <u>GO:0046519</u> | Sphingoid Metabolic Process                         | 0.00228  |
| <u>GO:0042221</u> | Response to Chemical Stimulus                       | 0.00296  |
| <u>GO:0006672</u> | Ceramide Metabolism                                 | 0.00431  |
| <u>GO:0033212</u> | Iron Assimilation                                   | 0.00431  |
| <u>GO:0000041</u> | Transition Metal Ion Transport                      | 0.00434  |
| <u>GO:0005740</u> | Mitochondrial Envelope                              | 0.00434  |
| <u>GO:0030503</u> | Regulation of Cell Redox                            | 0.00434  |
| <u>GO:0045454</u> | Cell Redox Homeostasis                              | 0.00434  |
| <u>GO:0006979</u> | Response to Oxidative Stress                        | 0.00537  |
| <u>GO:0051186</u> | Cofactor Metabolism                                 | 0.00764  |
| <u>GO:0030001</u> | Metal Ion Transport                                 | 0.00944  |
| <u>GO:0006827</u> | High Affinity Iron Ion Transport                    | 0.00974  |
| <u>GO:0015343</u> | Siderophore - Iron Transmembrane Transport Activity | 0.00974  |
| <u>GO:0042927</u> | Siderophore Transporter Activity                    | 0.00974  |
| Cluster 2         |                                                     | P-Value  |
| <u>GO:0006464</u> | Protein Modification                                | 0.00956  |
| Cluster 3         |                                                     | P-Value  |
| <u>GO:0003964</u> | RNA-directed DNA Polymerase Activity                | 0.000663 |
| <u>GO:0003887</u> | DNA - directed DNA Polymerase Activity              | 0.00123  |
| <u>GO:0007015</u> | Actin Filament Organization                         | 0.00176  |
| <u>GO:0044464</u> | Cell Part                                           | 0.00217  |
| <u>GO:0016772</u> | Phospho-transferase Activity                        | 0.00274  |
| Cluster 4         |                                                     | P-Value  |
| <u>GO:0005730</u> | Nucleolus                                           | 6.60E-37 |
| <u>GO:0022613</u> | Ribonucleoprotein Complex Biogenesis & Assembly     | 1.46E-36 |
| <u>GO:0043228</u> | Non-membrane Bound Organelle                        | 2.11E-36 |
| <u>GO:0043232</u> | Intracellular Non-membrane Bound Organelle          | 2.11E-36 |
| <u>GO:0010467</u> | Gene Expression                                     | 3.40E-36 |
| <u>GO:0042254</u> | Ribosome Biogenesis & Assembly                      | 8.42E-36 |
| <u>GO:0016072</u> | rRNA Metabolic Process                              | 1.31E-30 |
| <u>GO:0006364</u> | rRNA Processing                                     | 5.48E-30 |
| <u>GO:0044452</u> | Nucleolar Part                                      | 8.68E-30 |

|                   |                                           |                |
|-------------------|-------------------------------------------|----------------|
| <u>GO:0032991</u> | Macromolecular Complex                    | 9.81E-28       |
| <u>GO:0030529</u> | Ribonucleoprotein Complex                 | 4.62E-27       |
| <u>GO:0043170</u> | Macromolecular Metabolic Complex          | 1.22E-24       |
| <u>GO:0006412</u> | Translation                               | 1.75E-22       |
| <u>GO:0031981</u> | Nuclear Lumen                             | 6.77E-22       |
| <u>GO:0005732</u> | Small Nucleolar Ribonucleoprotein Complex | 4.22E-21       |
| <u>GO:0019843</u> | rRNA Binding                              | 1.24E-19       |
| <u>GO:0005829</u> | Cytosol                                   | 1.27E-19       |
| <u>GO:0000154</u> | rRNA Modification                         | 8.68E-19       |
| <u>GO:0031428</u> | snoRNP Complex                            | 8.68E-19       |
| <u>GO:0044422</u> | Organelle Part                            | 1.45E-18       |
| <u>GO:0044446</u> | Intracellular Organelle Part              | 1.45E-18       |
| <u>GO:0044428</u> | Nuclear Part                              | 7.98E-18       |
| <u>GO:0030555</u> | RNA Modification                          | 7.29E-17       |
| <u>GO:0030556</u> | rRNA Modification                         | 7.29E-17       |
| <u>GO:0044445</u> | Cytosolic Part                            | 8.57E-17       |
| <u>GO:0009987</u> | Cellular Process                          | 1.27E-16       |
| <u>GO:0009059</u> | Macromolecule Biosynthetic Process        | 1.73E-16       |
| <u>GO:0044238</u> | Primary Metabolic Process                 | 2.05E-16       |
| <u>GO:0005830</u> | Cytosolic Ribosome                        | 2.44E-16       |
| <u>GO:0006996</u> | Organelle Organization                    | 2.44E-16       |
| <b>Cluster 5</b>  |                                           | <b>P-Value</b> |
| <u>GO:0060090</u> | Molecular Adaptor                         | 3.84E-14       |
| <u>GO:0030533</u> | Triplet Codon-amino acid adaptor          | 3.84E-14       |
| <u>GO:0006414</u> | Translation Elongation                    | 3.84E-14       |
| <u>GO:0043284</u> | Biopolymer Biosynthetic Process           | 1.02E-13       |
| <u>GO:0000943</u> | Retrotransposon Nucleocapsid              | 3.90E-09       |
| <u>GO:0032197</u> | RNA - mediated Transposition              | 6.02E-09       |
| <u>GO:0005829</u> | Cytosol                                   | 2.33E-08       |
| <u>GO:0006412</u> | Translation                               | 2.33E-08       |
| <u>GO:0032196</u> | Transposition                             | 1.98E-07       |
| <u>GO:0009059</u> | Macromolecular Biosynthetic Process       | 5.63E-07       |
| <u>GO:0044260</u> | Cellular Macromolecule Metabolic Process  | 2.07E-05       |
| <u>GO:0019538</u> | Protein Metabolic Process                 | 2.40E-05       |
| <u>GO:0044267</u> | Cellular Protein Metabolic Process        | 2.40E-05       |
| <u>GO:0010467</u> | Gene Expression                           | 0.000207       |
| <u>GO:0044249</u> | Cellular Biosynthetic Process             | 0.00575        |

**Figure S1**

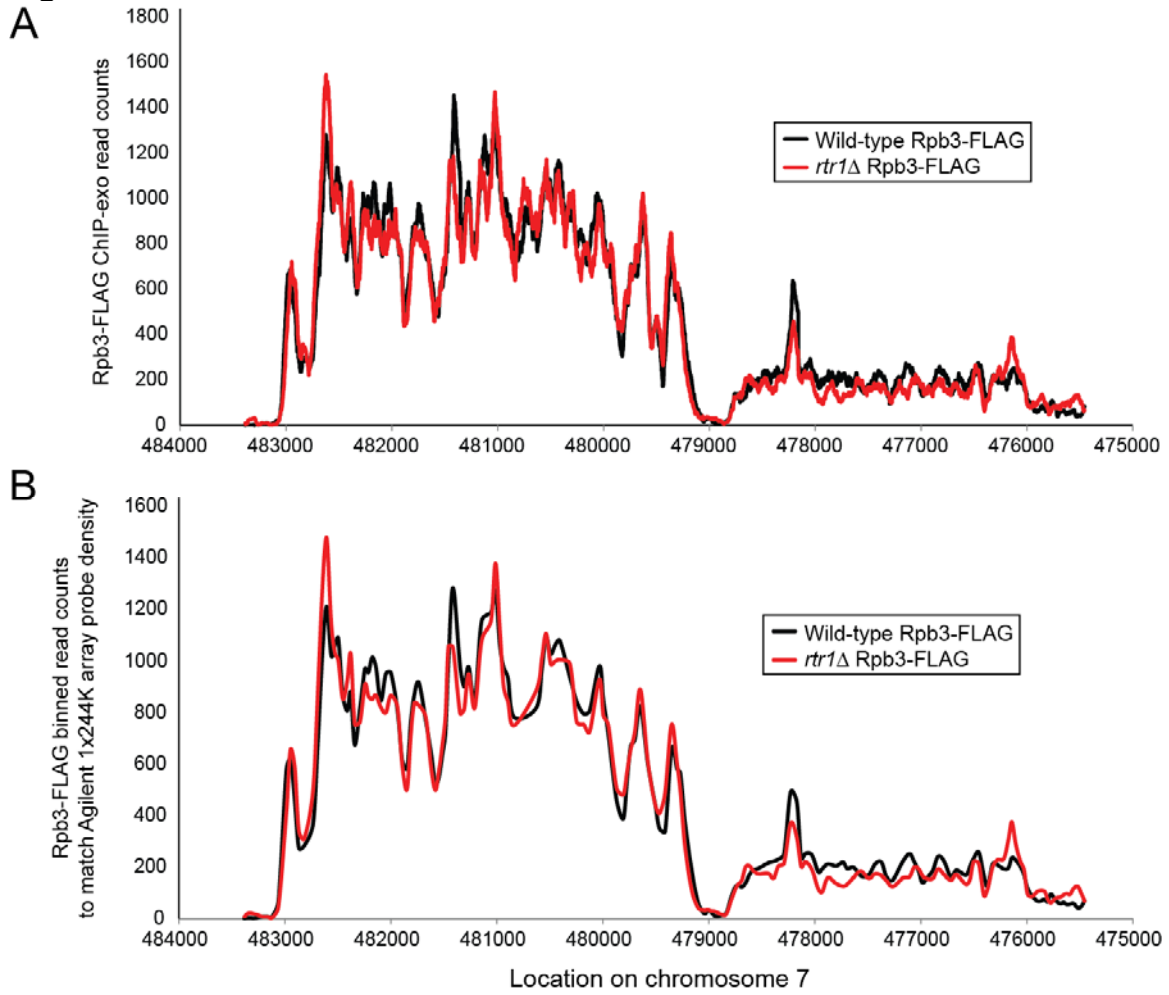

**Figure S2**

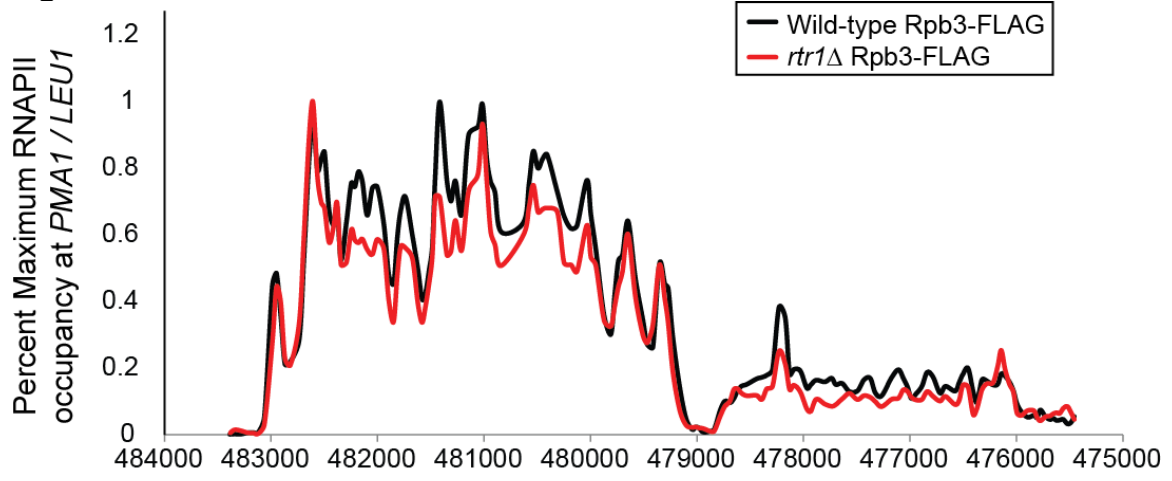

Figure S3

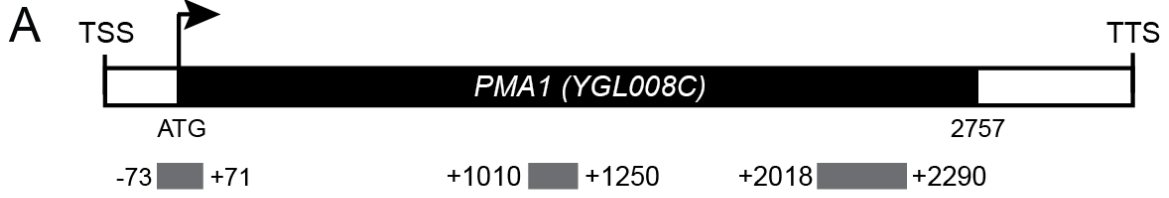

B

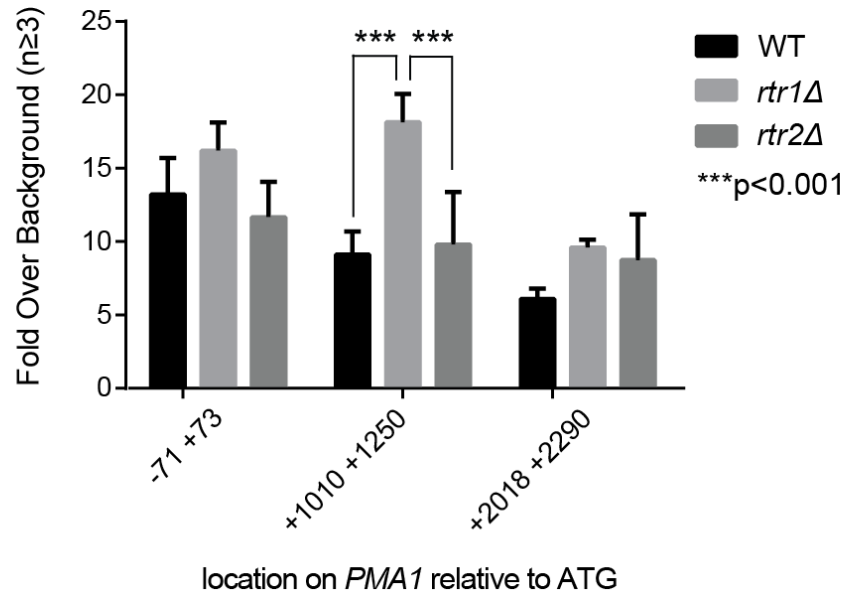



## References

1. Gelperin, D.M., White, M.A., Wilkinson, M.L., Kon, Y., Kung, L.A., Wise, K.J., Lopez-Hoyo, N., Jiang, L., Piccirillo, S., Yu, H. *et al.* (2005) Biochemical and genetic analysis of the yeast proteome with a movable ORF collection. *Genes & development*, **19**, 2816-2826.
2. Rhee, H.S. and Pugh, B.F. (2012) ChIP-exo method for identifying genomic location of DNA-binding proteins with near-single-nucleotide accuracy. *Current protocols in molecular biology / edited by Frederick M. Ausubel ... [et al.]*, **Chapter 21**, Unit 21 24.
3. Kim, M., Suh, H., Cho, E.J. and Buratowski, S. (2009) Phosphorylation of the yeast Rpb1 C-terminal domain at serines 2, 5, and 7. *The Journal of biological chemistry*, **284**, 26421-26426.
4. Komarnitsky, P., Cho, E.J. and Buratowski, S. (2000) Different phosphorylated forms of RNA polymerase II and associated mRNA processing factors during transcription. *Genes & development*, **14**, 2452-2460.
5. Mosley, A.L., Pattenden, S.G., Carey, M., Venkatesh, S., Gilmore, J.M., Florens, L., Workman, J.L. and Washburn, M.P. (2009) Rtr1 is a CTD phosphatase that regulates RNA polymerase II during the transition from serine 5 to serine 2 phosphorylation. *Molecular cell*, **34**, 168-178.
6. Fox, M.J., Gao, H., Smith-Kinnaman, W.R., Liu, Y. and Mosley, A.L. (2015) The exosome component Rrp6 is required for RNA polymerase II termination at specific targets of the Nrd1-Nab3 pathway. *PLoS genetics*, **11**, e1004999.
7. Rhee, H.S. and Pugh, B.F. (2011) Comprehensive genome-wide protein-DNA interactions detected at single-nucleotide resolution. *Cell*, **147**, 1408-1419.
8. Gibney, P.A., Fries, T., Bailer, S.M. and Morano, K.A. (2008) Rtr1 is the *Saccharomyces cerevisiae* homolog of a novel family of RNA polymerase II-binding proteins. *Eukaryotic cell*, **7**, 938-948.
9. Egloff, S., Zaborowska, J., Laitem, C., Kiss, T. and Murphy, S. (2012) Ser7 phosphorylation of the CTD recruits the RPAP2 Ser5 phosphatase to snRNA genes. *Molecular cell*, **45**, 111-122.
